# Supplementary material
Source: HighWire-hosted journal article supplement (https://cmajopen.ca/highwire/filestream/80990/field_highwire_adjunct_files/0/open-2016-0056-1-at.pdf)
Supplement: open-2016-0056-1-at.pdf [file open-2016-0056-1-at.pdf]

**Appendix 1 (as supplied by the authors): ATC Level 5 codes identifying benzodiazepine and z-drug dispensations**

| <b>ATC 5 CODE</b> | <b>ATC 5 NAME</b>     | <b>Drug Class</b> |
|-------------------|-----------------------|-------------------|
| N03AE01           | CLONAZEPAM            | Benzodiazepines   |
| N05BA01           | DIAZEPAM              | Benzodiazepines   |
| N05BA02           | CHLORDIAZEPOXIDE      | Benzodiazepines   |
| N05BA05           | CLORAZEPATE POTASSIUM | Benzodiazepines   |
| N05CD01           | FLURAZEPAM            | Benzodiazepines   |
| N05BA04           | OXAZEPAM              | Benzodiazepines   |
| N05BA06           | LORAZEPAM             | Benzodiazepines   |
| N05BA12           | ALPRAZOLAM            | Benzodiazepines   |
| N05CD05           | TRIAZOLAM             | Benzodiazepines   |
| N05CD07           | TEMAZEPAM             | Benzodiazepines   |
| N05BA08           | BROMAZEPAM            | Benzodiazepines   |
| N05CD02           | NITRAZEPAM            | Benzodiazepines   |
| N05CF01           | ZOPICLONE             | Z-drugs           |
| N05CF02           | ZOLPIDEM              | Z-drugs           |
| N05CF03           | ZALEPLON              | Z-drugs           |

Appendix to: Weymann D, Gladstone EM, Smolina K et al. Long-term sedative use among community-dwelling adults: a population-based analysis. *CMAJ Open* 2017.

DOI:10.9778/cmajo.20160056. Copyright © 2017 The Author(s) or their employer(s).

To receive this resource in an accessible format, please contact us at [cmajgroup@cmaj.ca](mailto:cmajgroup@cmaj.ca).
